# Supplementary material
Source: PubMed Central journal article supplement (PMC7744327)

### **Supplementary Figure Legend.**

**Supplementary Fig. 1. a,** Schematic of the hexosamine biosynthesis pathway and  $^{15}\text{N}$  incorporation from  $[\gamma\text{-}^{15}\text{N}]\text{glutamine}$  (labeled in pink) into the HBP intermediates. **b,** Time course of  $^{15}\text{N}$  labeling in UDP-HexNAc, ManNAc, and Neu5Ac in K and KL cells cultured in medium containing  $[\gamma\text{-}^{15}\text{N}]\text{glutamine}$  (30m, 1hr, 2hrs, and 6hrs). Individual data points represent the average value of each cell line (3 replicates/cell line). Statistical significance was assessed using two-way ANOVA followed by Sidak's multiple comparisons test. \* $p < 0.05$ ; \*\*\*\* $p < 0.0001$ . The stable isotope labeling experiment was performed once.

**Supplementary Fig. 2. Gating strategies used throughout the study. a,** Gating strategy for cell death (PI-Annexin V assays). **b,** Gating strategy for lectin binding assays.

**Supplementary Fig. 3. Representative flow cytometry plots of lectin binding assays. a and b,** Representative plots of the L-PHA binding (**a**) and LEA binding (**b**) assays shown in Fig 2e. The oncogenotypes of each cell line and MFI of the dot plot are shown. FACS analyses were performed twice.

a

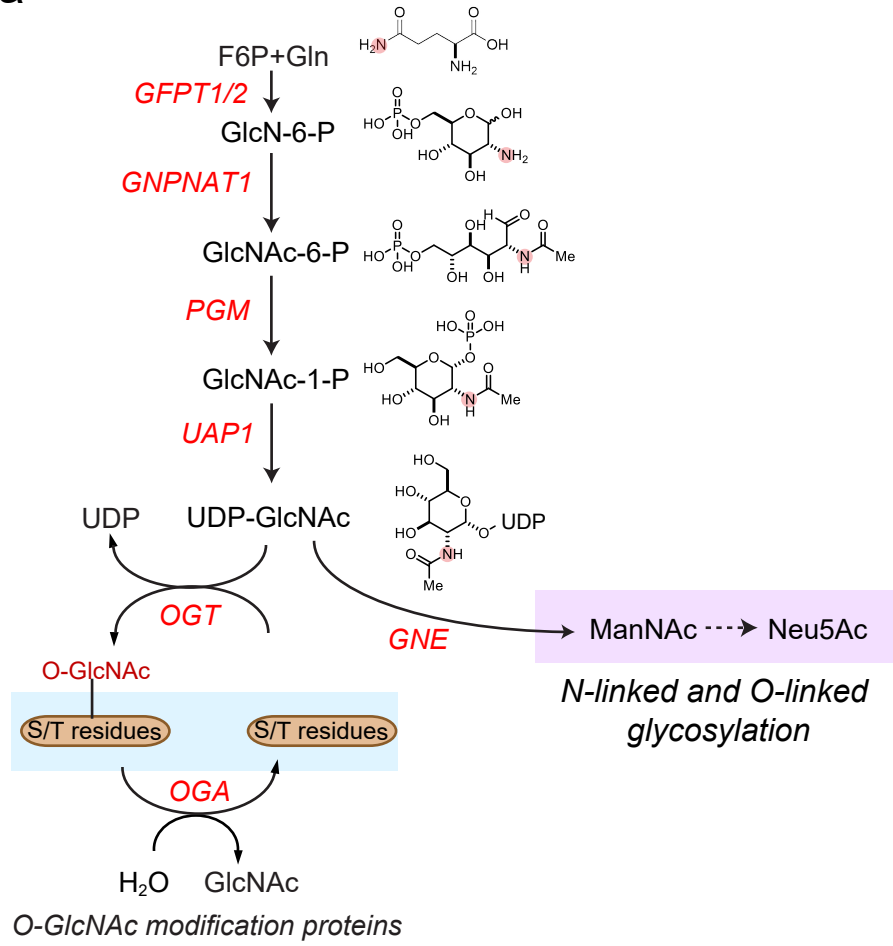

b

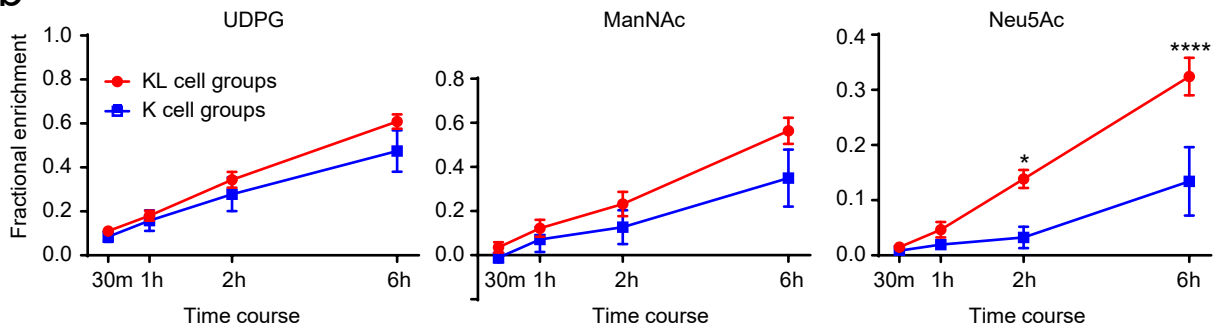

## a. PI/Annexin V-FITC staining

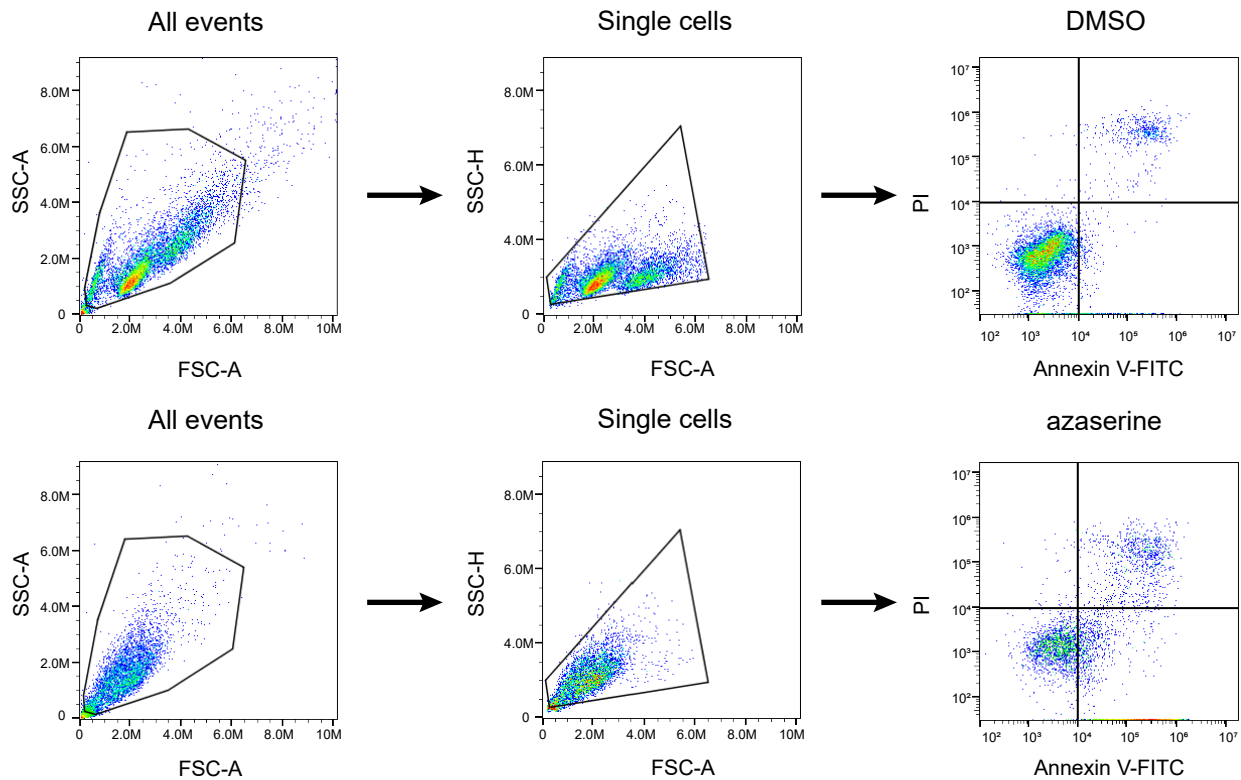

## b. Lectin binding assay

L-PHA

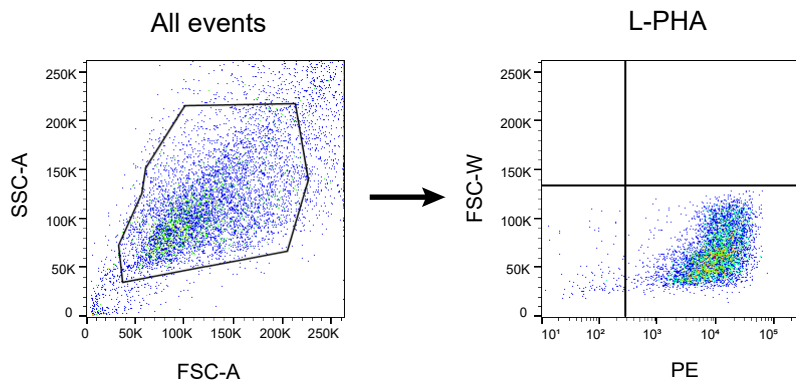

LEA

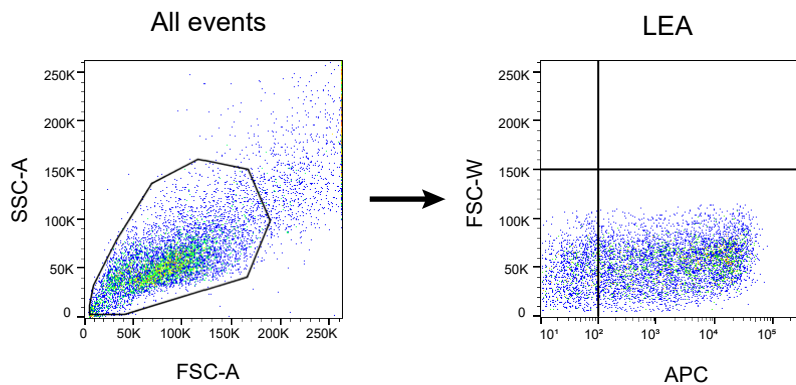

## a. L-PHA representative dot plots

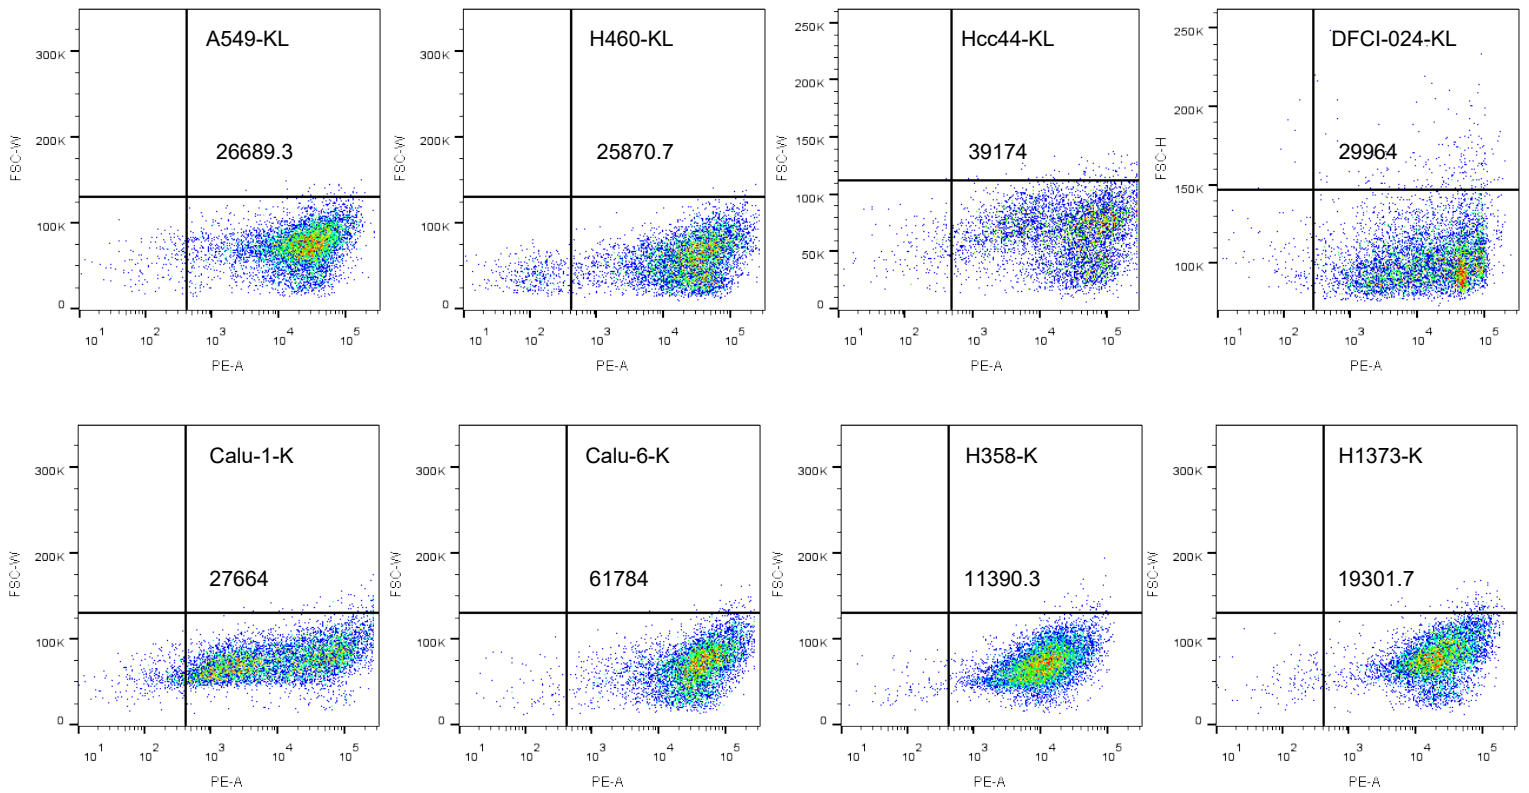

## b. LEA representative dot plots

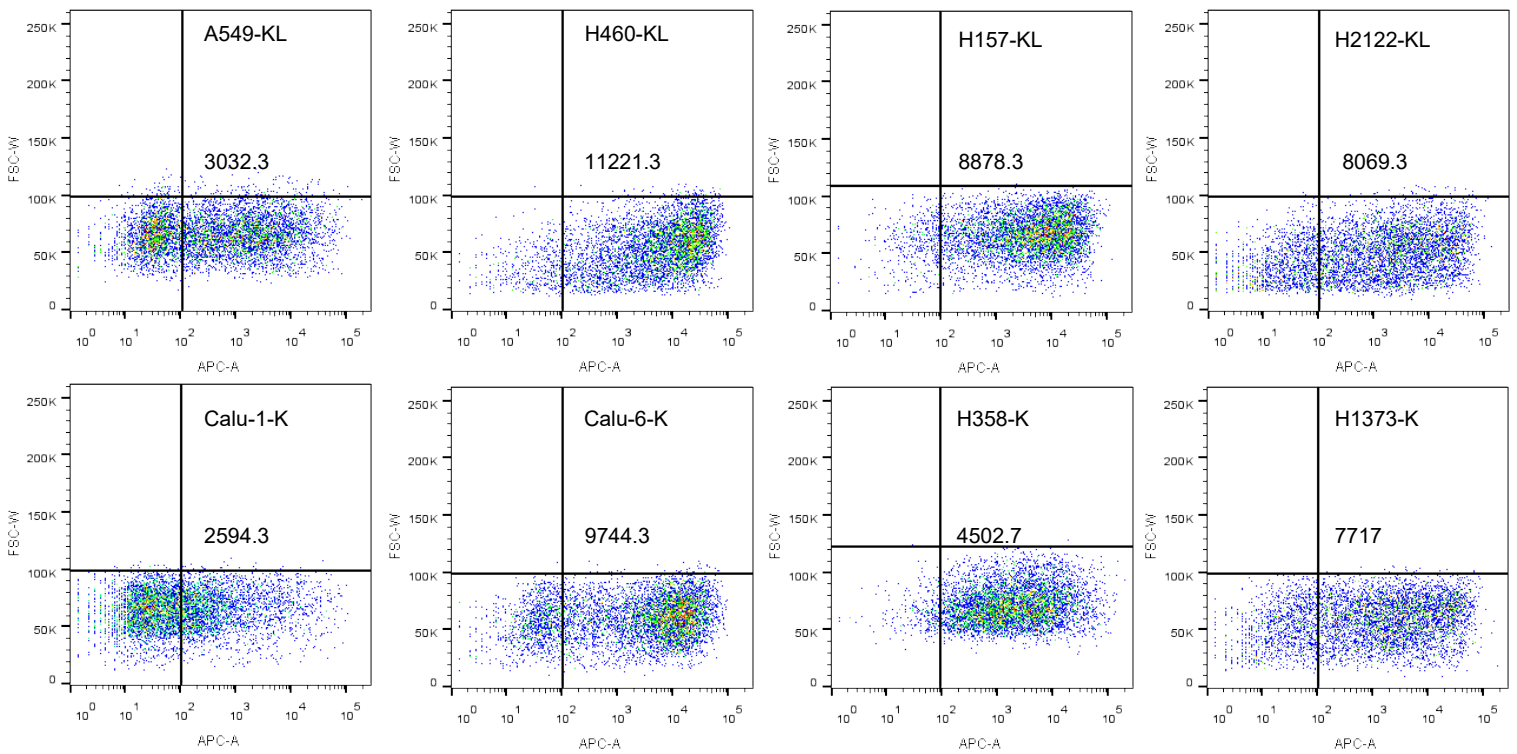

Supplement: NIHMS1640258-supplement-1.pdf [file NIHMS1640258-supplement-1.pdf]
